# Supplementary material
Source: Royal Society of Chemistry journal article supplement (doi:10.1039/d6va00055j)
Supplement: d6va00055j1.pdf [file d6va00055j1.pdf]

## Supplementary Information

to

# Antimicrobial resistant bacteria in wastewater-irrigated Mexican soils and transfer of resistant bacteria from irrigated soils to cilantro plants

Dipen Pulami<sup>a</sup>, Deeksha Bhati<sup>a</sup>, Sara Gallego<sup>b</sup>, Kornelia Smalla<sup>b</sup>, Kathia Lüneberg<sup>c</sup>, Christina Siebe<sup>c</sup>, Benjamin Heyde<sup>d,e</sup>, Jan Siemens<sup>d</sup>, Stefanie P. Glaeser<sup>a\*</sup>

<sup>a</sup>Institut für Angewandte Mikrobiologie, Justus-Liebig-Universität Giessen, Giessen D-35392, Germany

<sup>b</sup>Julius Kühn-Institute (JKI), Federal Research Centre for Cultivated Plants, Institute for Epidemiology and Pathogen Diagnostics, Braunschweig, Germany

<sup>c</sup>Instituto de Geología, Universidad Nacional Autónoma de México, Ciudad Universitaria, México

<sup>d</sup>Institute of Soil Science and Soil Conservation, iFZ Research Center for BioSystems, Land Use and Nutrition, Justus Liebig University Giessen, Heinrich-Buff-Ring 26-32, Giessen D-35392, Germany

<sup>e</sup>Ruhr University Bochum, Institute of Geography, Unit Soil Sciences and Soil Resources, Bochum, Germany

\*Correspondence: Stefanie P. Glaeser (Stefanie.Glaeser@umwelt.uni-giessen.de)

**Table S1.** Physiochemical wastewater parameters and concentrations of antibiotic and biocidal compound present in or spiked to irrigation water types (according to Soufi *et al.*, 2025)

| Parameters                    | WWTP influent  | WWTP effluent | Spiked concentrations |
|-------------------------------|----------------|---------------|-----------------------|
| pH                            | 7.4            | 7.4           |                       |
| EC                            | 1300           | 1300          |                       |
| BOD [mg/L]                    | 50             | 12            |                       |
| COD [mg/L]                    | 320            | 110           |                       |
| TOC [mg/L]                    | 65             | 34            |                       |
| Azithromycin [ng/L]           | 0-1390         | 0-1330        | 695000                |
| Ciprofloxacin [ng/L]          | 2350-3390      | 1940-2270     | 1695000               |
| Clindamycin [ng/L]            | < DL           | < DL          | 60000***              |
| (Anhydro)Erythromycin [ng/L]* | 210 (<QL) -370 | 170-250 (<QL) | 185000                |
| Sulfamethoxazole [ng/L]       | 3190-3990      | 2820-3780     | 1995000               |
| Trimethoprim [ng/L]           | 1100-1300      | 1200-1400     | 650000                |
| Sum ATMACs [ng/L]             | 170            | 98            | 84546                 |
| ATMAC-C8                      | 12             | 12            | 5770                  |
| ATMAC-C10                     | 11             | 10            | 5326                  |
| ATMAC-C12                     | 24             | 16            | 11766                 |
| ATMAC-C14                     | 13             | 11            | 6493                  |
| ATMAC-C16                     | 110            | 49            | 55191                 |
| Sum BACs [ng/L]               | 524            | 200           | 261650                |
| BAC-C8                        | 9              | 9             | 4322                  |
| BAC-C10                       | 12             | 12            | 6115                  |
| BAC-C12                       | 318            | 95            | 158921                |
| BAC-C14                       | 141            | 53            | 70559                 |
| BAC-C16                       | 19             | 14            | 9287                  |
| BAC-C18                       | 25             | 17            | 12446                 |
| Sum DADMACs [ng/L]            | 208            | 53            | 156452                |
| DADMAC-C8                     | 0 (21)**       | 0 (21)**      | 10527                 |
| DADMAC-C10                    | 0 (21)**       | 0 (21)**      | 10527                 |
| DADMAC-C12                    | 0 (21)**       | 0 (21)**      | 10527                 |
| DADMAC-C14                    | 0 (21)**       | 0 (21)**      | 10527                 |
| DADMAC-C16                    | 0 (21)**       | 0 (21)**      | 10527                 |
| DADMAC-C18                    | 208            | 53            | 103817                |

\*Anhydroerythromycin = degradation product of erythromycin

\*\* concentration <DL, therefore the median of all QAACs was used as concentration

\*\*\* Clindamycin was not detected. The spiked concentration was calculated using the concentration found in Siemens *et al.*, (2008) (120 [ng/L]).

EC: electrical conductivity; BOD: biochemical oxygen demand; COD: chemical oxygen demand; TOC: total organic carbon; N<sub>tot</sub>: total nitrogen; NO<sub>3</sub><sup>-</sup>-N: Nitrate content; NH<sub>4</sub><sup>+</sup>-N: ammonium content; ATMACs: alkyltrimethyl ammonium compounds; BACs: benzylalkyldimethyl ammonium compounds; DADMAC: dialkyldimethyl ammonium compounds, QL: quantification limit; DL: detection limit

**Table S2** Details of primer systems used in this study.

| Target                                           | Primers                            | 5'-3' sequences                                    | Primer concentration ( $\mu\text{M}$ ) | Annealing temperature | Product size                         | Reference                                         |
|--------------------------------------------------|------------------------------------|----------------------------------------------------|----------------------------------------|-----------------------|--------------------------------------|---------------------------------------------------|
| Repetitive extragenic palindromic (REP) sequence | BOXA1R                             | CTACGGCAAGGCGACGCTGACG                             | 1 $\mu\text{M}$                        | 53°C                  | Strain specific genomic fingerprints | Versalovic et al. (1994)<br>Glaeser et al. (2013) |
| 16S rRNA gene                                    | EUB9F<br>EUB1492R                  | GAGTTTGATCMTGGCTCAG<br>CGGTTACCTTGTTACGACTT        | 0.2 $\mu\text{M}$<br>0.2 $\mu\text{M}$ | 54°C                  | ~1470 bp                             | Lane (1991)                                       |
| <i>nrdA</i>                                      | <i>nrdA</i> -F<br><i>nrdA</i> -R   | GAACTGGATTCCCGACCTGTTC<br>TTCGATTTGACGTACAAGTTCTGG | 0.2 $\mu\text{M}$<br>0.2 $\mu\text{M}$ | 56°C                  | 954 bp                               | Spilker et al. (2012)                             |
| <i>gyrA</i>                                      | <i>gyrA</i> -F1<br><i>gyrA</i> -R1 | CCGGTATCGCTGGAAGAAGAGA<br>CCTGCTCGCTGCCGTCGTA      | 0.2 $\mu\text{M}$<br>0.2 $\mu\text{M}$ | 57°C                  | 436 bp                               | Magallon et al. (2021)                            |
| <i>parC</i>                                      | <i>parC</i> -F<br><i>parC</i> -R   | ATCGGCGACGGCCTGAAGCC<br>CGGGATTCGGTATAACGCAT       | 0.2 $\mu\text{M}$<br>0.2 $\mu\text{M}$ | 55°C                  | 273 bp                               | Furlan et al. (2018)                              |
| <i>qnrB</i>                                      | <i>qnrBm</i> -F<br><i>qnrBm</i> -R | GGMATHGAAATTCGCCACTG<br>TTTGCYGYCGCCAGTCGAA        | 0.2 $\mu\text{M}$<br>0.2 $\mu\text{M}$ | 54°C                  | 264 bp                               | Cattoir et al. (2007);<br>Alipour et al. (2024)   |
| <i>qnrS</i>                                      | <i>qnrSm</i> -F<br><i>qnrSm</i> -R | GCAAGTTCATTGAACAGGGT<br>TCTAAACCGTCGAGTTCGGCG      | 0.2 $\mu\text{M}$<br>0.2 $\mu\text{M}$ | 54°C                  | 428 bp                               | Cattoir et al. (2007);<br>Alipour et al. (2024)   |

**Table S3.** Absolute abundance ( $\log_{10}$  CFU mL<sup>-1</sup>) of bacteria cultivated on MH and R2A from wastewater used for incubation experiment. The data represented the mean CFU mL<sup>-1</sup> obtained after spotting four independent dilution series of each wastewater types (influent, effluent, and both spiked) on respective media plates (four technical replications, see Fig. S2). Standard deviations reflect variability among the four technical replicates (independent dilution series; n=4). For water samples technical replicates were compared because just one water sample per water sample type was available for the experiment. Asterisk (\*) showed significant difference (Two-way ANOVA;  $p < 0.05$ ).

| Targeted heterotrophic culturable bacteria                     | Concentration in $\log_{10}$ CFU mL <sup>-1</sup> [Mean ( $\pm$ Standard deviation)] |                   |                      |                      |
|----------------------------------------------------------------|--------------------------------------------------------------------------------------|-------------------|----------------------|----------------------|
|                                                                | Unspiked                                                                             |                   | Spiked               |                      |
|                                                                | Influent                                                                             | Effluent          | Influent             | Effluent             |
| <b>Bacteria cultivated on MH (-/+ supplements) 37°C, 24 h</b>  |                                                                                      |                   |                      |                      |
| Bacteria on MH                                                 | 5.9 ( $\pm$ 5.1)                                                                     | 5.3 ( $\pm$ 4.6)* | 6.6 ( $\pm$ 6.0)*    | 5.6 ( $\pm$ 0.0)*    |
| CIP resistant bacteria (MH+CIP)                                | 4.4 ( $\pm$ 4.1)                                                                     | 4.1 ( $\pm$ 3.5)  | 4.2 ( $\pm$ 3.8)     | 3.4 ( $\pm$ 3.2)*    |
| TRI/SUL resistant bacteria (MH+TRI/SUL)                        | 5.3 ( $\pm$ 4.3)                                                                     | 3.7 ( $\pm$ 3.3)* | 5.3 ( $\pm$ 0.0)     | 5.1 ( $\pm$ 4.7)*    |
| ERY/CLI resistant bacteria (MH+ERY/CLI)                        | 5.4 ( $\pm$ 4.7)                                                                     | 3.9 ( $\pm$ 3.5)* | 6.5 ( $\pm$ 6.1)*    | 4.9 ( $\pm$ 4.6)*    |
| BAC-C12 tolerant bacteria (MH+BAC-C12)                         | 4.0 ( $\pm$ 3.3)                                                                     | 3.3 ( $\pm$ 2.9)* | 4.3 ( $\pm$ 3.6)*    | 3.6 ( $\pm$ 3.0)*    |
| <b>Bacteria cultivated on R2A (-/+ supplements) 25°C, 48 h</b> |                                                                                      |                   |                      |                      |
| Bacteria on R2A                                                | 6.9 ( $\pm$ 6.2)                                                                     | 6.0 ( $\pm$ 5.3)* | 6.9 ( $\pm$ 6.2)     | 6.2 ( $\pm$ 5.4)     |
| CIP resistant bacteria (R2A+CIP)                               | 5.7 ( $\pm$ 5.4)                                                                     | 4.2 ( $\pm$ 3.8)* | 5.9 ( $\pm$ 5.3)     | 5.6 ( $\pm$ 5.2)*    |
| TRI/SUL resistant bacteria (R2A+TRI/SUL)                       | 5.6 ( $\pm$ 5.4)                                                                     | 4.4 ( $\pm$ 3.4)* | 6.1 ( $\pm$ 5.7)*    | 5.3 ( $\pm$ 4.9)*    |
| ERY/CLI resistant bacteria (R2A+ERY/CLI)                       | 6.3 ( $\pm$ 5.6)                                                                     | 5.0 ( $\pm$ 5.0)* | 6.7 ( $\pm$ 5.9)*    | 5.8 ( $\pm$ 5.0)*    |
| BAC-C12 tolerant bacteria (R2A+BAC-C12)                        | 3.6 ( $\pm$ 3.0)                                                                     | 3.3 ( $\pm$ 2.4)* | 4.7 ( $\pm$ 0.0)*    | 4.0 ( $\pm$ 3.6)*    |
| <b>Significance test to</b>                                    |                                                                                      | to Influent       | to Unspiked-Influent | to Unspiked-Effluent |

**Table S4.** Absolute abundance ( $\log_{10}$  CFU  $g^{-1}$ ) of bacteria cultivated on MH and R2A from soils before irrigation (0 days) and after four weeks following irrigation with unspiked-influent, unspiked-effluent, spiked-influent, and spiked-effluent, respectively. The data represent the mean CFU  $g^{-1}$  obtained for four fields analysed per soil type (Leptosol, Phaeozem, and Vertisol). Standard deviations given in brackets reflect variability among the four fields analysed per soil type (=biological replicates). Significant differences are marked in bold ( $p < 0.05$ , One-way ANOVA). The values for each biological replicate are arithmetic means of four technical replications (independent dilution series). For details see Figure S2.

|                                                                | Soils - 0 days (before water addition)                                            |                  |                                   | Soils - four weeks after water addition |                  |                  |                  |                  |                  |                  |                  |                  |                  |                  |                  |
|----------------------------------------------------------------|-----------------------------------------------------------------------------------|------------------|-----------------------------------|-----------------------------------------|------------------|------------------|------------------|------------------|------------------|------------------|------------------|------------------|------------------|------------------|------------------|
| Targeted cultivable heterotrophic bacteria                     | Absolute abundance in $\log_{10}$ CFU $g^{-1}$ [Mean ( $\pm$ Standard deviation)] |                  |                                   |                                         |                  |                  |                  |                  |                  |                  |                  |                  |                  |                  |                  |
| Soil types                                                     | Leptosol                                                                          | Phaeozem         | Vertisol                          | Leptosol                                |                  |                  |                  | Phaeozem         |                  |                  |                  | Vertisol         |                  |                  |                  |
|                                                                |                                                                                   |                  |                                   | Unspiked                                |                  | Spiked           |                  | Unspiked         |                  | Spiked           |                  | Unspiked         |                  | Spiked           |                  |
|                                                                |                                                                                   |                  |                                   | Influent                                | Effluent         | Influent         | Effluent         | Influent         | Effluent         | Influent         | Effluent         | Influent         | Effluent         | Influent         | Effluent         |
| <b>Bacteria cultivated on MH (-/+ supplements) 37°C, 24 h</b>  |                                                                                   |                  |                                   |                                         |                  |                  |                  |                  |                  |                  |                  |                  |                  |                  |                  |
| Bacteria on MH                                                 | <b>7.1 (<math>\pm</math> 0.1)</b>                                                 | 6.8 ( $\pm$ 0.1) | <b>6.4 (<math>\pm</math> 0.6)</b> | 6.6 ( $\pm$ 0.3)                        | 6.6 ( $\pm$ 0.2) | 6.7 ( $\pm$ 0.3) | 6.6 ( $\pm$ 0.2) | 6.5 ( $\pm$ 0.4) | 6.1 ( $\pm$ 0.4) | 6.4 ( $\pm$ 0.3) | 6.3 ( $\pm$ 0.4) | 6.7 ( $\pm$ 0.3) | 6.7 ( $\pm$ 0.4) | 6.4 ( $\pm$ 0.6) | 6.8 ( $\pm$ 0.3) |
| CIP resistant bacteria (MH+CIP)                                | 5.7 ( $\pm$ 0.3)                                                                  | 5.6 ( $\pm$ 0.4) | 5.7 ( $\pm$ 0.2)                  | 5.1 ( $\pm$ 0.6)                        | 5.1 ( $\pm$ 0.6) | 5.0 ( $\pm$ 0.7) | 5.2 ( $\pm$ 0.6) | 4.8 ( $\pm$ 0.4) | 5.1 ( $\pm$ 0.9) | 5.1 ( $\pm$ 0.8) | 5.4 ( $\pm$ 1.0) | 5.0 ( $\pm$ 0.7) | 5.1 ( $\pm$ 0.7) | 5.2 ( $\pm$ 0.8) | 5.1 ( $\pm$ 0.8) |
| TRI/SUL resistant bacteria (MH+TRI/SUL)                        | 5.4 ( $\pm$ 0.2)                                                                  | 5.3 ( $\pm$ 0.1) | 5.3 ( $\pm$ 0.3)                  | 5.9 ( $\pm$ 0.1)                        | 5.6 ( $\pm$ 0.4) | 5.7 ( $\pm$ 0.3) | 6.1 ( $\pm$ 0.2) | 5.6 ( $\pm$ 0.6) | 5.5 ( $\pm$ 0.5) | 5.6 ( $\pm$ 0.4) | 5.6 ( $\pm$ 0.6) | 5.5 ( $\pm$ 0.5) | 5.8 ( $\pm$ 0.2) | 5.9 ( $\pm$ 0.1) | 5.8 ( $\pm$ 0.1) |
| ERY/CLI resistant bacteria (MH+ERY/CLI)                        | 5.5 ( $\pm$ 0.4)                                                                  | 4.9 ( $\pm$ 0.2) | 4.9 ( $\pm$ 0.3)                  | 5.6 ( $\pm$ 0.5)                        | 5.7 ( $\pm$ 0.2) | 5.3 ( $\pm$ 0.2) | 5.5 ( $\pm$ 0.3) | 5.2 ( $\pm$ 0.6) | 5.1 ( $\pm$ 0.6) | 5.0 ( $\pm$ 0.2) | 5.2 ( $\pm$ 0.6) | 5.5 ( $\pm$ 0.4) | 5.2 ( $\pm$ 0.6) | 5.8 ( $\pm$ 0.2) | 5.6 ( $\pm$ 0.2) |
| BAC-C12 tolerant bacteria (MH+BAC-C12)                         | 3.5 ( $\pm$ 0.6)                                                                  | 3.7 ( $\pm$ 0.5) | 4.0 ( $\pm$ 0.2)                  | 4.2 ( $\pm$ 0.1)                        | 4.2 ( $\pm$ 0.2) | 4.5 ( $\pm$ 0.7) | 4.3 ( $\pm$ 0.1) | 4.2 ( $\pm$ 0.5) | 4.3 ( $\pm$ 0.6) | 4.3 ( $\pm$ 0.5) | 4.3 ( $\pm$ 0.4) | 4.7 ( $\pm$ 0.4) | 4.7 ( $\pm$ 0.6) | 4.7 ( $\pm$ 0.4) | 4.5 ( $\pm$ 0.4) |
| <b>Bacteria cultivated on R2A (-/+ supplements) 25°C, 48 h</b> |                                                                                   |                  |                                   |                                         |                  |                  |                  |                  |                  |                  |                  |                  |                  |                  |                  |
| Bacteria on R2A                                                | 6.6 ( $\pm$ 0.3)                                                                  | 6.4 ( $\pm$ 0.5) | 6.5 ( $\pm$ 0.4)                  | 6.7 ( $\pm$ 0.5)                        | 6.7 ( $\pm$ 0.5) | 6.6 ( $\pm$ 0.5) | 6.5 ( $\pm$ 0.5) | 6.4 ( $\pm$ 0.4) | 6.1 ( $\pm$ 0.6) | 6.2 ( $\pm$ 0.4) | 6.3 ( $\pm$ 0.2) | 6.3 ( $\pm$ 0.7) | 6.5 ( $\pm$ 0.7) | 6.3 ( $\pm$ 0.6) | 6.4 ( $\pm$ 0.6) |
| CIP resistant bacteria (R2A+CIP)                               | 6.0 ( $\pm$ 0.5)                                                                  | 5.7 ( $\pm$ 0.3) | 5.4 ( $\pm$ 0.5)                  | 5.8 ( $\pm$ 1.2)                        | 6.0 ( $\pm$ 1.0) | 6.0 ( $\pm$ 1.2) | 5.8 ( $\pm$ 1.0) | 5.6 ( $\pm$ 0.8) | 5.5 ( $\pm$ 0.9) | 5.6 ( $\pm$ 0.7) | 5.6 ( $\pm$ 0.9) | 5.9 ( $\pm$ 0.8) | 5.8 ( $\pm$ 0.9) | 5.9 ( $\pm$ 0.9) | 5.5 ( $\pm$ 1.0) |
| TRI/SUL resistant bacteria (R2A+TRI/SUL)                       | 5.0 ( $\pm$ 0.1)                                                                  | 5.1 ( $\pm$ 0.1) | 4.9 ( $\pm$ 0.2)                  | 5.1 ( $\pm$ 0.5)                        | 5.1 ( $\pm$ 0.4) | 5.0 ( $\pm$ 0.5) | 5.0 ( $\pm$ 0.3) | 4.7 ( $\pm$ 0.7) | 4.7 ( $\pm$ 0.8) | 4.7 ( $\pm$ 0.6) | 4.7 ( $\pm$ 0.6) | 5.0 ( $\pm$ 0.3) | 5.3 ( $\pm$ 0.6) | 4.7 ( $\pm$ 0.4) | 5.5 ( $\pm$ 0.6) |
| ERY/CLI resistant bacteria (R2A+ERY/CLI)                       | 6.1 ( $\pm$ 0.6)                                                                  | 5.5 ( $\pm$ 0.5) | 5.7 ( $\pm$ 0.6)                  | 6.0 ( $\pm$ 0.5)                        | 5.8 ( $\pm$ 0.5) | 5.6 ( $\pm$ 0.5) | 5.8 ( $\pm$ 0.6) | 5.5 ( $\pm$ 0.5) | 5.2 ( $\pm$ 0.7) | 5.5 ( $\pm$ 0.5) | 5.5 ( $\pm$ 0.8) | 5.7 ( $\pm$ 0.7) | 5.7 ( $\pm$ 0.5) | 5.7 ( $\pm$ 0.6) | 5.9 ( $\pm$ 0.3) |
| BAC-C12 tolerant bacteria (R2A+BAC-C12)                        | 3.6 ( $\pm$ 0.4)                                                                  | 3.7 ( $\pm$ 0.4) | 4.0 ( $\pm$ 0.1)                  | 4.0 ( $\pm$ 0.4)                        | 4.0 ( $\pm$ 0.4) | 4.2 ( $\pm$ 0.9) | 4.0 ( $\pm$ 0.5) | 4.0 ( $\pm$ 0.4) | 4.0 ( $\pm$ 0.5) | 4.0 ( $\pm$ 0.7) | 4.0 ( $\pm$ 0.5) | 4.3 ( $\pm$ 0.3) | 4.8 ( $\pm$ 0.9) | 4.1 ( $\pm$ 0.3) | 4.4 ( $\pm$ 0.7) |





## Supplementary Figures

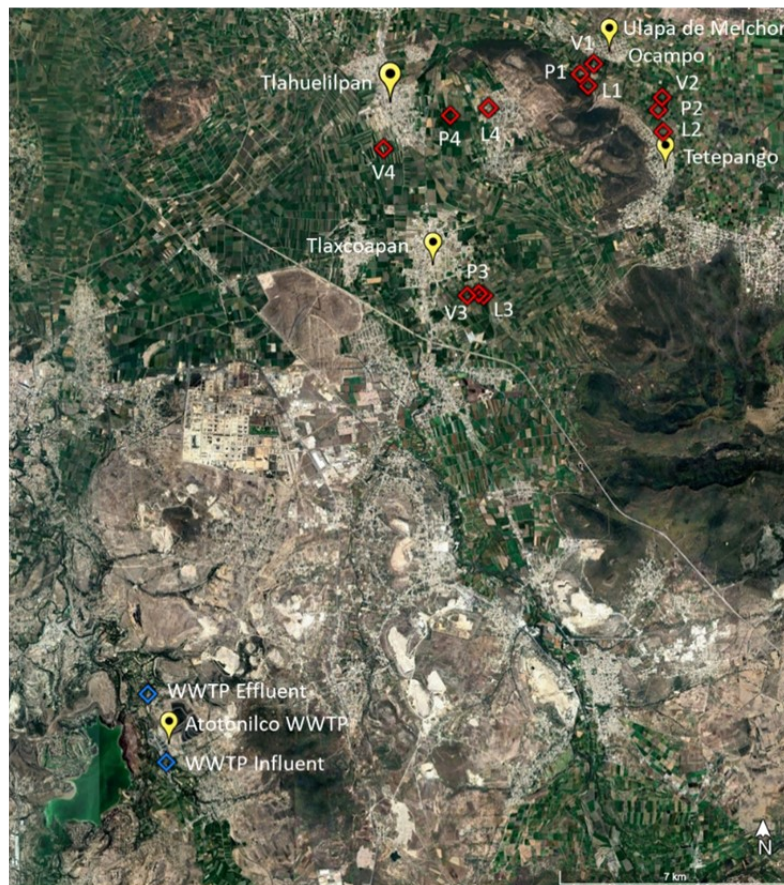

| Location                       | Years of UWW irrigation | Soil type     | Coordinates    |                 |
|--------------------------------|-------------------------|---------------|----------------|-----------------|
| Ulapa de Melchor<br>Ocampo     | 111                     | Leptosol (L1) | 20° 8' 9.5" N  | 99° 10' 31.3" W |
|                                |                         | Phaeozem (P1) | 20° 8' 13.6" N | 99° 10' 23.5" W |
|                                |                         | Vertisol (V1) | 20° 8' 30.9" N | 99° 10' 25.3" W |
| Between Tetepango and<br>Ulapa | 60                      | Leptosol (L2) | 20° 7' 24.5" N | 99° 9' 13.3" W  |
|                                |                         | Phaeozem (P2) | 20° 7' 45.7" N | 99° 9' 18.4" W  |
|                                |                         | Vertisol (V2) | 20° 7' 58" N   | 99° 9' 14.3" W  |
| Tlaxcoapan (Bojayito<br>Chico) | 92                      | Leptosol (L3) | 20° 4' 44.9" N | 99° 12' 20.1" W |
|                                |                         | Phaeozem (P3) | 20° 4' 47" N   | 99° 12' 25" W   |
|                                |                         | Vertisol (V3) | 20° 4' 45" N   | 99° 12' 37" W   |
| Tlahuelilpan                   | 101                     | Leptosol (L4) | 20° 7' 28.4" N | 99° 12' 36.3" W |
|                                |                         | Phaeozem (P4) | 20° 7' 40.4" N | 99° 12' 54.5" W |
|                                |                         | Vertisol (V4) | 20° 7' 8.24" N | 99° 14' 3.78" W |

**Figure S1.** Geographical area, location, coordinates, and years of untreated wastewater (UWW) irrigation of the agricultural fields used for the study (L1: Leptosol field 1; L2: Leptosol Field 2; L3: Leptosol Field 3; L4: Leptosol Field 4; P1: Phaeozem field 1; P2: Phaeozem Field 2; P3: Phaeozem Field 3; P4: Phaeozem Field 4; V1: Vertisol field 1; V2: Vertisol Field 2; V3: Vertisol Field 3; V4: Vertisol Field 4). Adapted from Soufi *et al.*, (2025)

Per soil type: composite samples of four fields with an identical irrigation history were studied

**Sampling and experimental setups:**

Four composite field samples based each on eight soil cores

Composite field sample four field = four biol. replicates per soil type

Soil mesocosms (each 200 g soil)

Four irrigation water types (25 mL per soil microcosm)

**Microbiological analysis:**

**Soil – 0 days before irrigation:** Four technical replications (dilution series) per field composite sample per agar medium

**Irrigation water:** Four technical replication dilution series) per water type per agar medium

**Soil – 4 weeks after irrigation:** Four technical replications per soil microcosm (dilution series) were analysed per agar medium

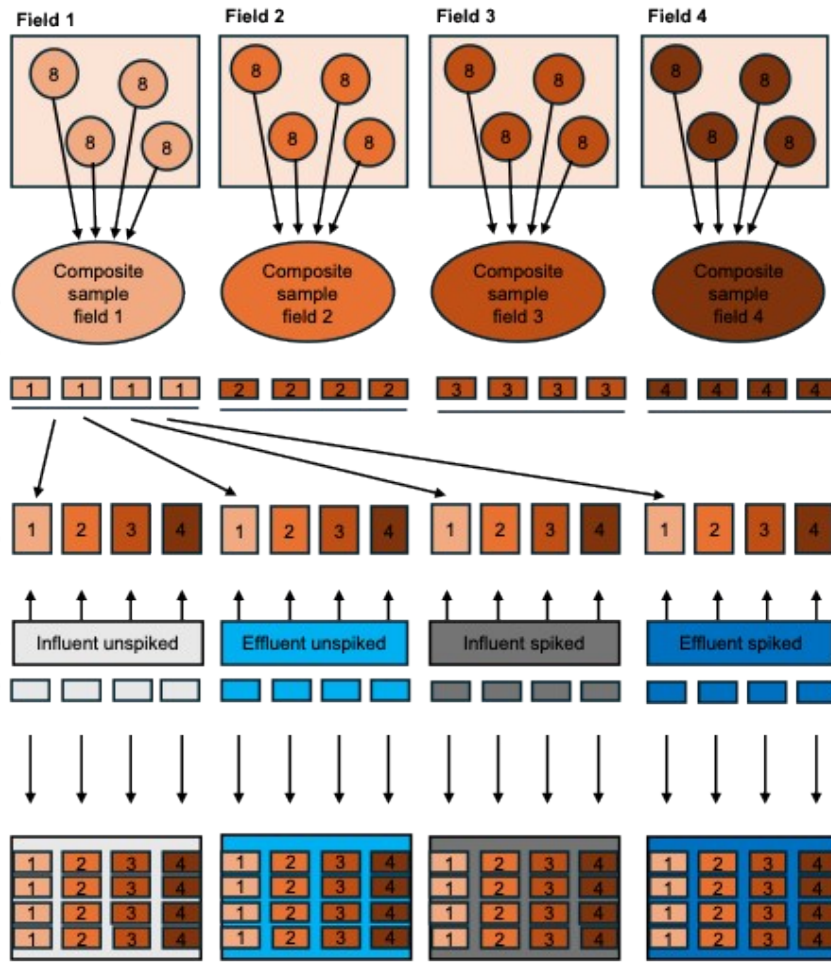

**Figure S2** Overview of sample collection in Mexican fields, set up of the incubation experiment, and performed microbiological analyses

| A | Absolute abundance (log <sub>10</sub> CFU per mL wastewater or g soil) | Fecal indicator bacteria                     | <i>E. coli</i><br>3GCR <i>E. coli</i><br>Enterococci<br>VRE | Irrigation water |              |              |              | Soil - 0 days          |             |                  | Soil - four weeks after irrigation |              |                                |              |             |             |                                |             |             |             |                                |             |             |  |
|---|------------------------------------------------------------------------|----------------------------------------------|-------------------------------------------------------------|------------------|--------------|--------------|--------------|------------------------|-------------|------------------|------------------------------------|--------------|--------------------------------|--------------|-------------|-------------|--------------------------------|-------------|-------------|-------------|--------------------------------|-------------|-------------|--|
|   |                                                                        |                                              |                                                             | Wastewater       |              |              |              | Leptosol               | Phaeozem    | Vertisol         | Leptosol                           |              |                                |              | Phaeozem    |             |                                |             | Vertisol    |             |                                |             |             |  |
|   |                                                                        |                                              |                                                             | Unspiked         |              | Spiked       |              |                        |             |                  | Unspiked                           |              | Spiked                         |              | Unspiked    |             | Spiked                         |             | Unspiked    |             | Spiked                         |             |             |  |
|   |                                                                        |                                              |                                                             | Influent         | Effluent     | Influent     | Effluent     | Non-irrigated          |             |                  | Influent                           | Effluent     | Influent                       | Effluent     | Influent    | Effluent    | Influent                       | Effluent    | Influent    | Effluent    | Influent                       | Effluent    |             |  |
| B | Relative abundance (log <sub>10</sub> units)                           | Bacteria cultivated on MH at 37°C            | CIP resistant                                               | 0.5              | 0.8          | <b>-0.5*</b> | <b>-0.2*</b> | 0.6                    | 0.8         | 1.4              | 0.6                                | 0.5          | 0.4                            | 0.6          | 0.3         | 1.0         | 0.7                            | 1.1         | 0.3         | 0.4         | 0.7                            | 0.3         |             |  |
|   |                                                                        |                                              | TRIM/SUL resistant                                          | 1.4              | <b>0.5*</b>  | <b>0.6*</b>  | <b>1.5*</b>  | 0.4                    | 0.5         | 1.0              | <b>1.4*</b>                        | 1.0          | <b>1.1*</b>                    | <b>1.5*</b>  | <b>1.1*</b> | <b>1.4*</b> | <b>1.3*</b>                    | <b>1.3*</b> | 0.8         | 1.1         | 1.4                            | 1.0         |             |  |
|   |                                                                        |                                              | ERY/CLIN resistant                                          | 1.5              | <b>0.6*</b>  | <b>1.9*</b>  | <b>1.4*</b>  | 0.4                    | 0.1         | 0.6              | 1.0                                | 1.1          | 0.6                            | 0.9          | <b>0.7*</b> | <b>1.1*</b> | <b>0.7*</b>                    | <b>0.8*</b> | 0.8         | 0.4         | 1.4                            | 0.9         |             |  |
|   |                                                                        |                                              | BAC-C12 tolerant                                            | 0.1              | -0.0         | <b>-0.4*</b> | 0.1          | <b>-1.6</b>            | <b>-1.1</b> | <b>-0.4</b>      | <b>-0.3*</b>                       | <b>-0.4*</b> | <b>-0.2*</b>                   | <b>-0.3*</b> | <b>-0.3</b> | <b>0.3*</b> | <b>-0.1</b>                    | <b>-0.0</b> | <b>-0.0</b> | <b>-0.0</b> | <b>-0.0</b>                    | <b>0.3</b>  | <b>-0.3</b> |  |
|   |                                                                        | Bacteria cultivated on R2A at 25°C           | CIP resistant                                               | 0.8              | <b>0.1*</b>  | 1.0          | <b>1.4*</b>  | 1.4                    | 1.3         | 1.0              | 1.1                                | 1.4          | 1.3                            | 1.3          | 1.2         | 1.4         | 1.4                            | 1.3         | <b>1.7</b>  | 1.3         | <b>1.7</b>                     | 1.1         |             |  |
|   |                                                                        |                                              | TRIM/SUL resistant                                          | 0.7              | <b>0.4*</b>  | <b>1.2*</b>  | <b>1.1*</b>  | 0.4                    | 0.7         | 0.4              | 0.4                                | 0.4          | 0.4                            | 0.5          | 0.2         | 0.5         | 0.5                            | 0.4         | 0.7         | 0.8         | 0.4                            | <b>1.1*</b> |             |  |
|   |                                                                        |                                              | ERY/CLIN resistant                                          | 1.4              | <b>1.0*</b>  | <b>1.8*</b>  | <b>1.6*</b>  | 1.4                    | 1.2         | 1.2              | 1.3                                | 1.1          | 1.0                            | 1.3          | 1.1         | 1.1         | 1.3                            | 1.2         | 1.4         | 1.3         | 1.4                            | 1.5         |             |  |
|   |                                                                        |                                              | BAC-C12 tolerant                                            | <b>-1.3</b>      | <b>-0.8*</b> | <b>-0.2*</b> | <b>-0.2*</b> | <b>-1.1</b>            | <b>-0.6</b> | <b>-0.4</b>      | <b>-0.8</b>                        | <b>-0.7</b>  | <b>-0.5</b>                    | <b>-0.5</b>  | <b>-0.4</b> | <b>-0.2</b> | <b>-0.2</b>                    | <b>-0.3</b> | 0.0         | 0.4         | <b>-0.2</b>                    | 0.0         |             |  |
|   |                                                                        | Bold font/Asterick - significant differences |                                                             |                  |              | to in-fluent |              | to unspiked Wastewater |             | among soil types |                                    |              | to non irrigated soil (0 days) |              |             |             | to non irrigated soil (0 days) |             |             |             | to non irrigated soil (0 days) |             |             |  |

**Figure S3.** Heat map showing (A) mean absolute abundance (Log<sub>10</sub> CFU mL<sup>-1</sup> or g<sup>-1</sup>) of total and antimicrobial (CIP, TRIM/SUL, ERY/CLIN, and BAC-C12) resistant bacteria cultivable on MH and R2A and (B) mean relative abundances in WWTP influent and effluent and soil before (0 days) and after irrigation with both unspiked and spiked influent or effluent. Significant differences ( $p < 0.05$ ) are indicated with bold font and asterisks (\*). No growth: n.g. Mean values of four technical replications (irrigation water types) or four biological replications (four fields per soil type) are presented. Each biological replicate based on four technical replications. For details see Figure S2.

A

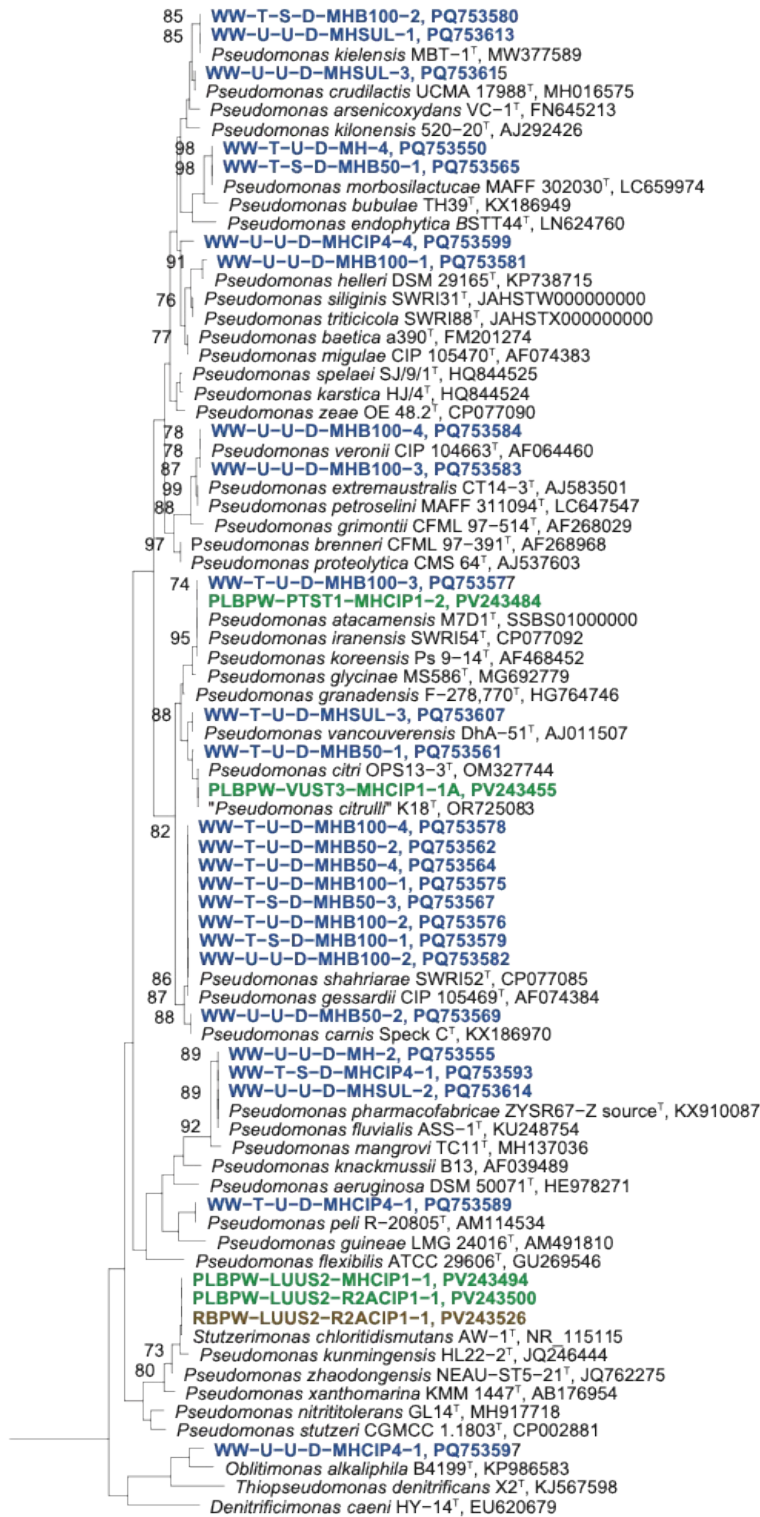

0.10

B

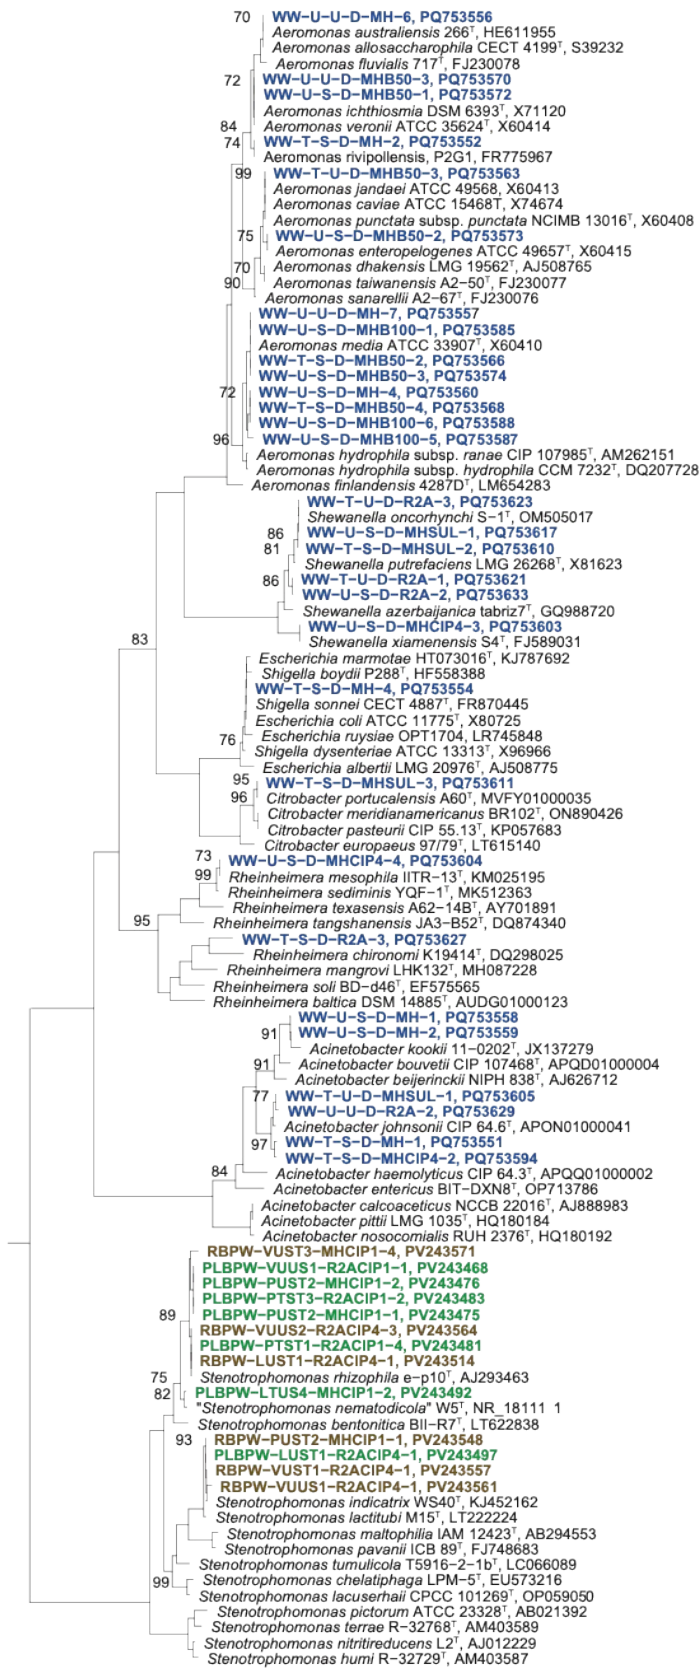

0.10

C

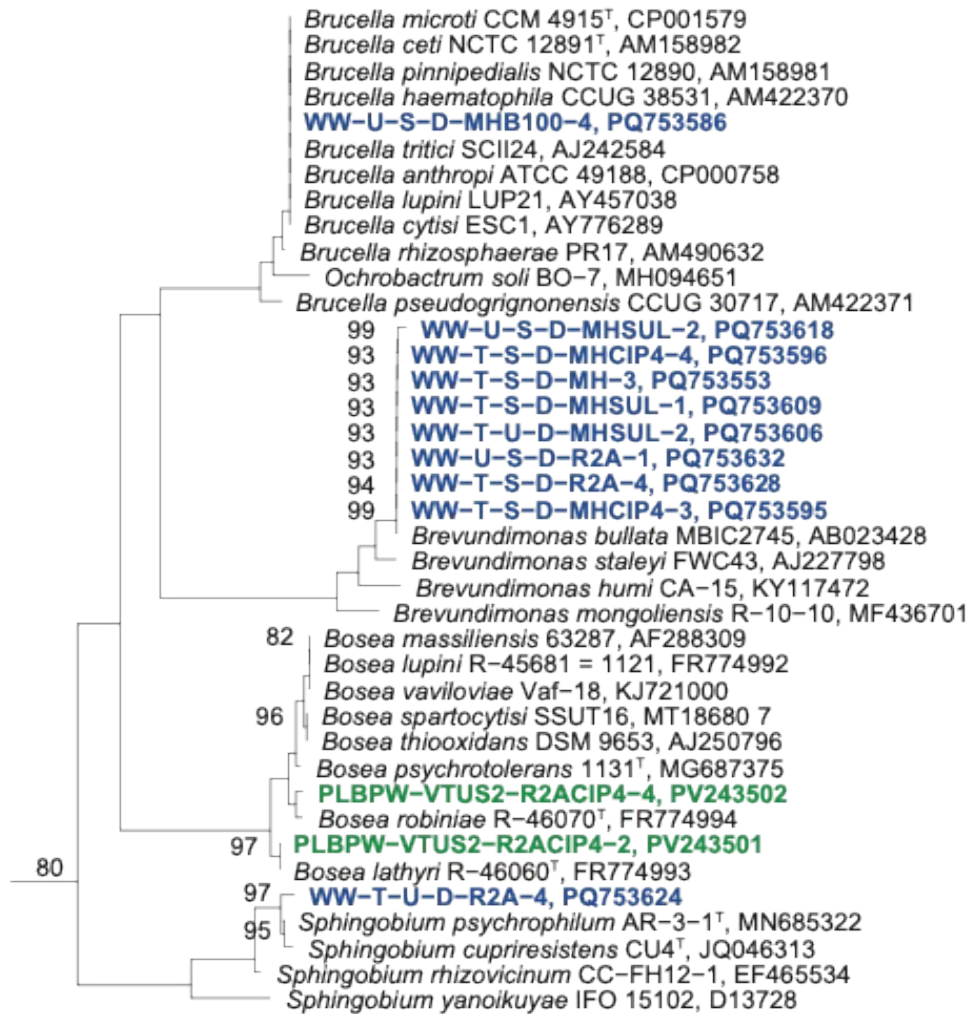

0.10



E

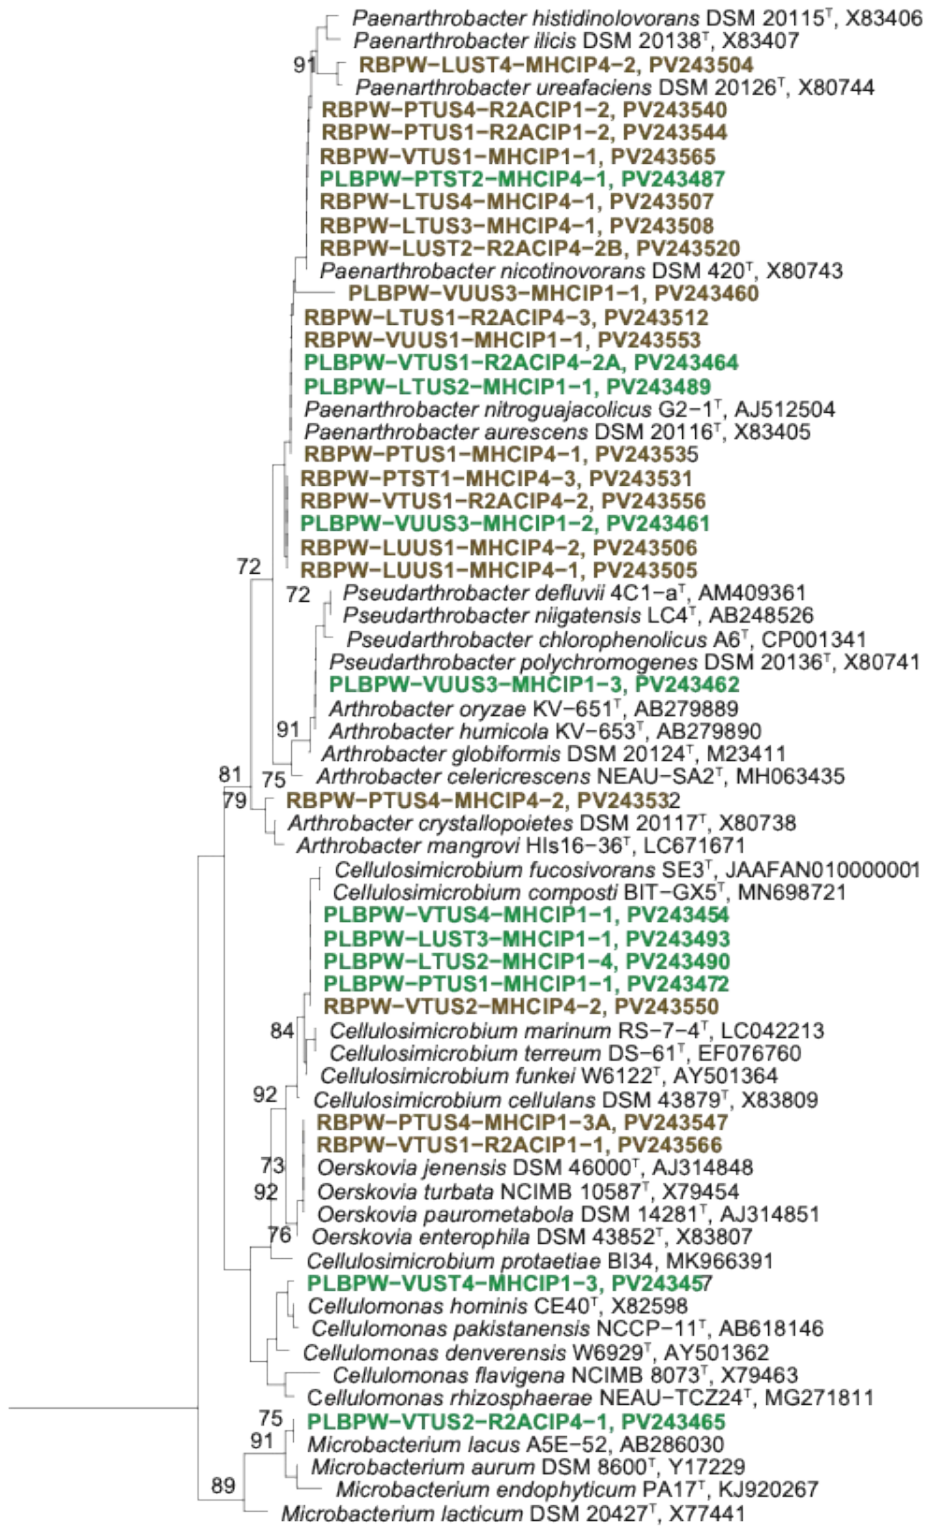

0.10

F

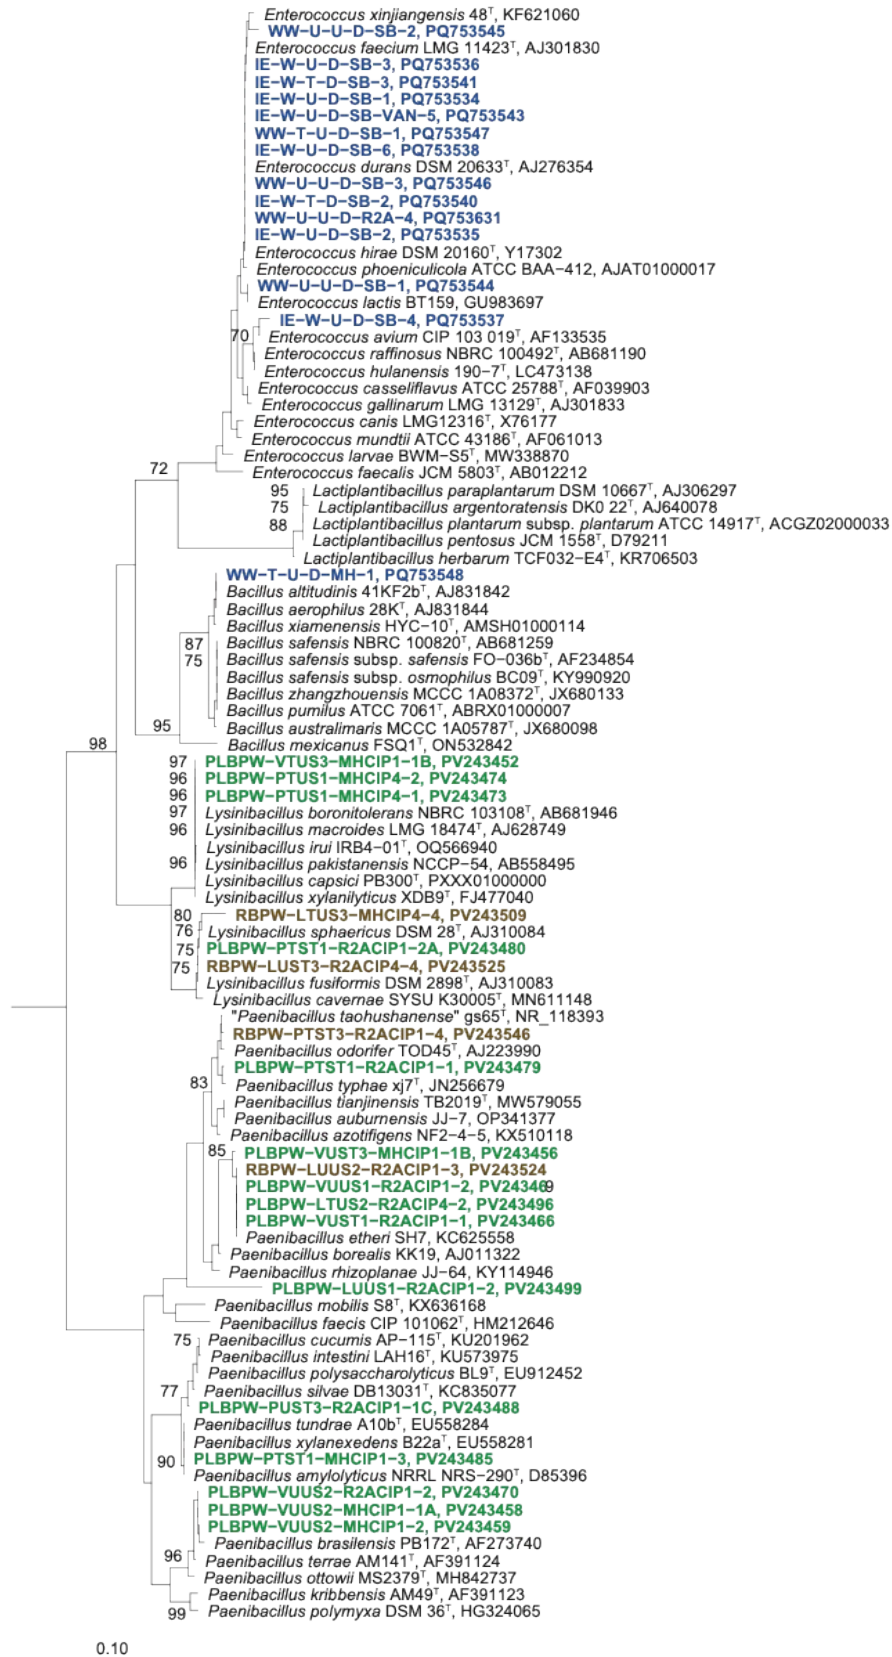

**Figure S4.** Phylogenetic placement of cultivated bacterial strains from this study based on partial 16S rRNA gene sequences. The phylogenetic tree was calculated in ARB in the LTP type strain database using the Neighbour joining method. Due to a better overview the calculated tree was split in subtrees. A/B: *Pseudomonadota* (*Gammaproteobacteria*); C: *Pseudomonadota* (*Alphaproteobacteria*); D: *Pseudomonadota* (*Betaproteobacteria*), *Campylobacterota*; *Bacteroidota*; E: *Actinomycetota*; F: *Bacillota*. Numbers at nodes: bootstrap values of 70% and larger. Scale bars: 0.1 substitutions per nucleotide position. Bold: sequences of strains cultivated from surface washed cilantro leaves (green coloured) and roots (brown colours) in this study or by irrigation water types (blue coloured) as described by Soufi *et al.* (2025).

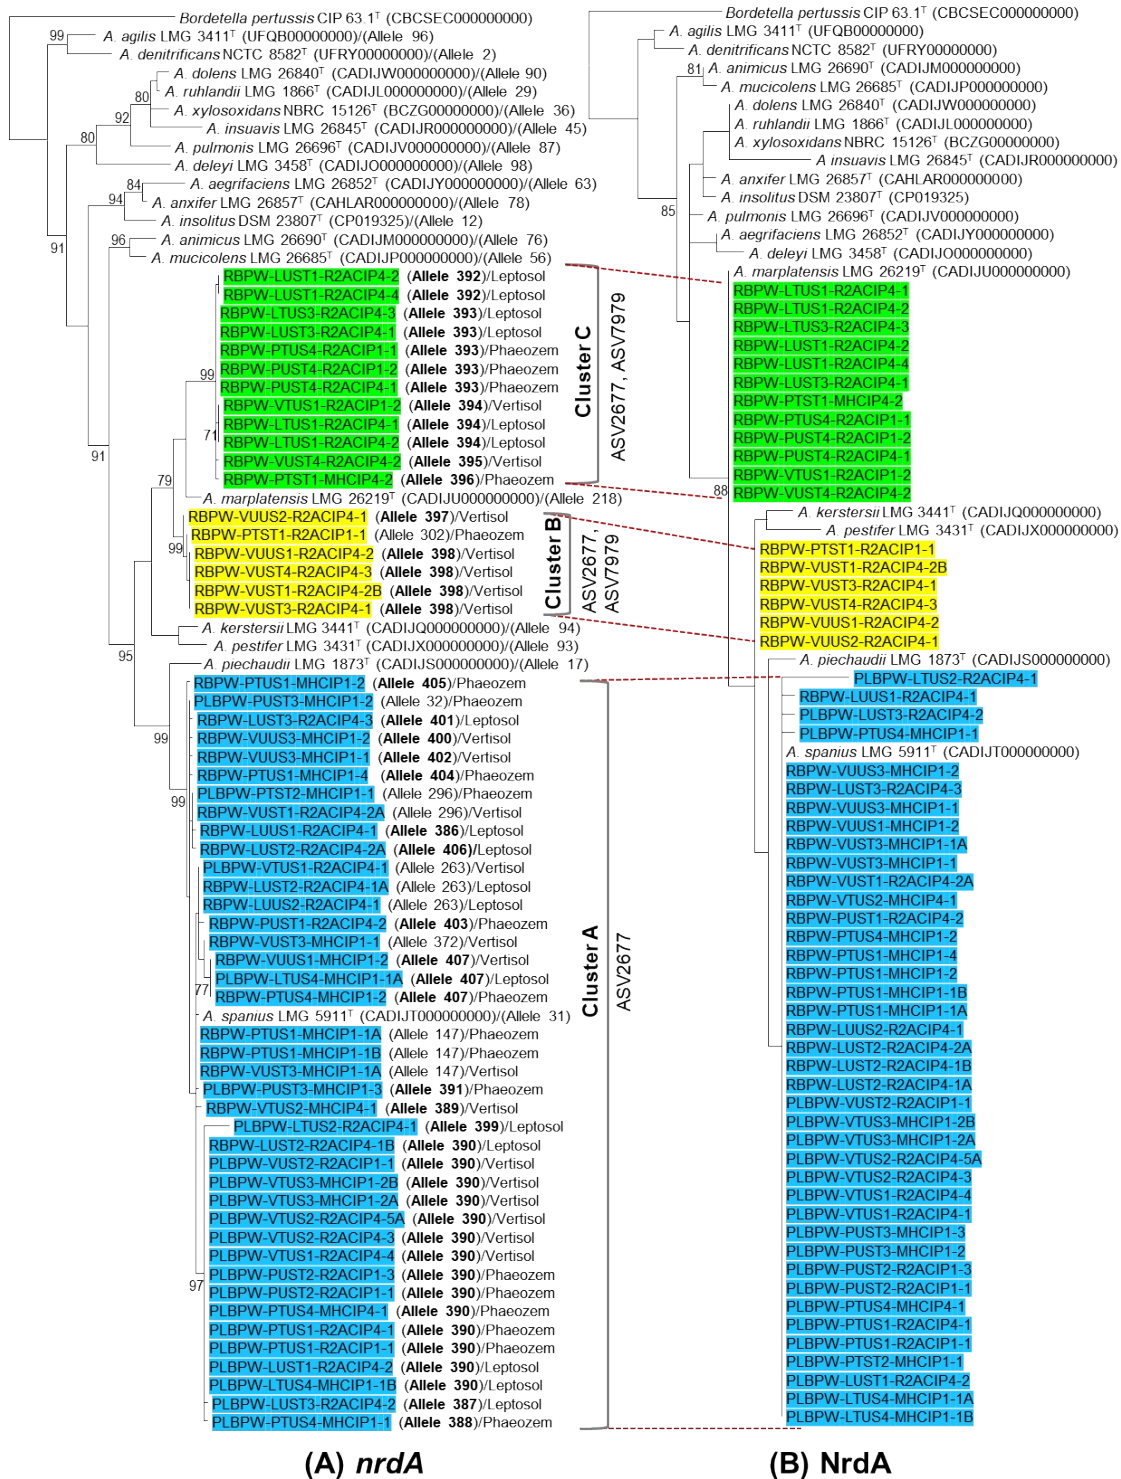

**Figure S5.** Phylogenetic placement of *Achromobacter* spp. strains within the genus *Achromobacter*. Phylogenetic analyses were performed using Maximum Likelihood method (Felsenstein 1981). Nucleotide based analysis was carried out by the General Time Reversible model (GTR; Nei and Kumar 2000). Amino acid-based analysis was done by the JTT matrix-based model (Jones, Taylor and Thornton. 1992). A discrete Gamma distribution was used to model evolutionary rate differences among sites [5 categories (+G)] assuming some sites to be evolutionarily invariable (+I). The trees of (A) *nrdA* and (B) *NrdA* were based on total of 765 nucleotides and 255 amino acids positions in the final datasets. All positions containing gaps and missing data were eliminated. Bootstrap values ( $\geq 70\%$ ) after 100 resamplings are indicated at branch nodes; bar, number of substitutions per site. Evolutionary analyses were conducted in MEGA11 (Tamura *et al.*, 2021). Novel alleles from this study were given in bold font.

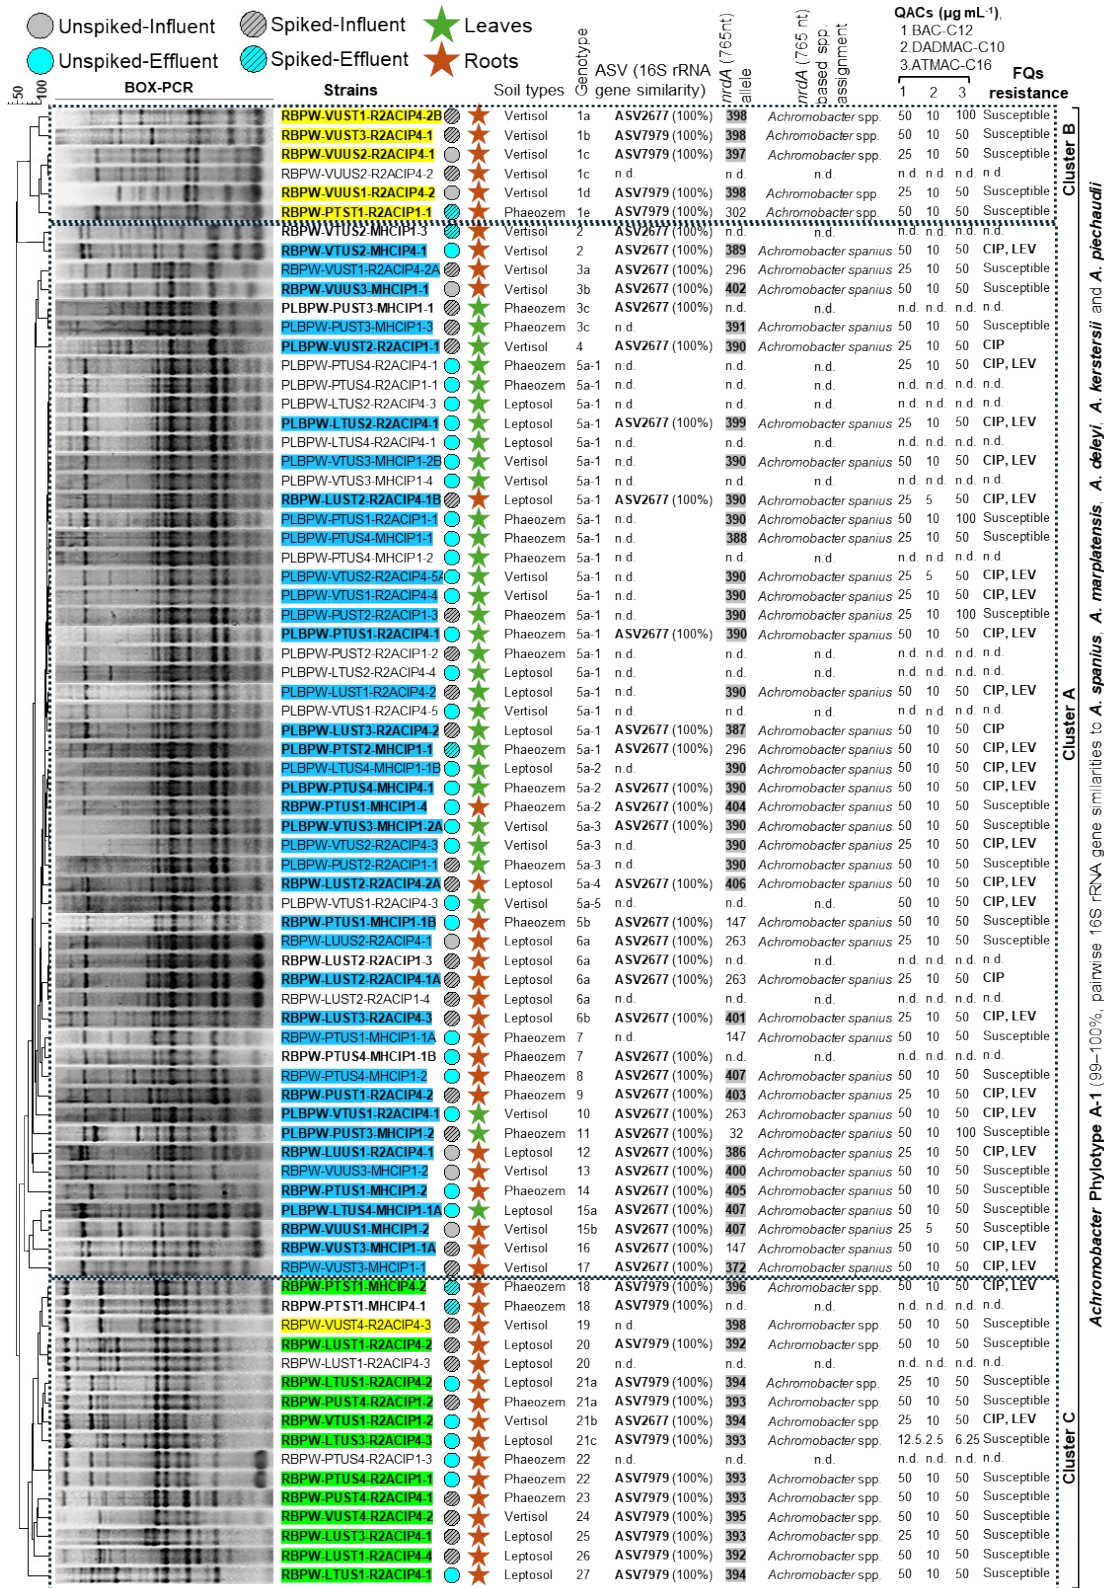

**Figure S6.** Genotyping of all *Achromobacter* spp. strains based on fingerprint patterns obtained by genomic fingerprinting using primers targeting BOX repetitive elements. Cluster analysis was performed in BioNumerics version 8 (Applied Maths, Belgium) using UPGMA clustering, based on a dissimilarity matrix generated by the Pearson correlation coefficient. Strains in bold font were identified by partial 16S rRNA gene sequencing. Species assignment as *Achromobacter spanius* was based on *nrdA* gene, and species assignment provided inside the brackets were based on identical BOX pattern (same genotype). Allele numbers with bold font represented novel alleles from this study.



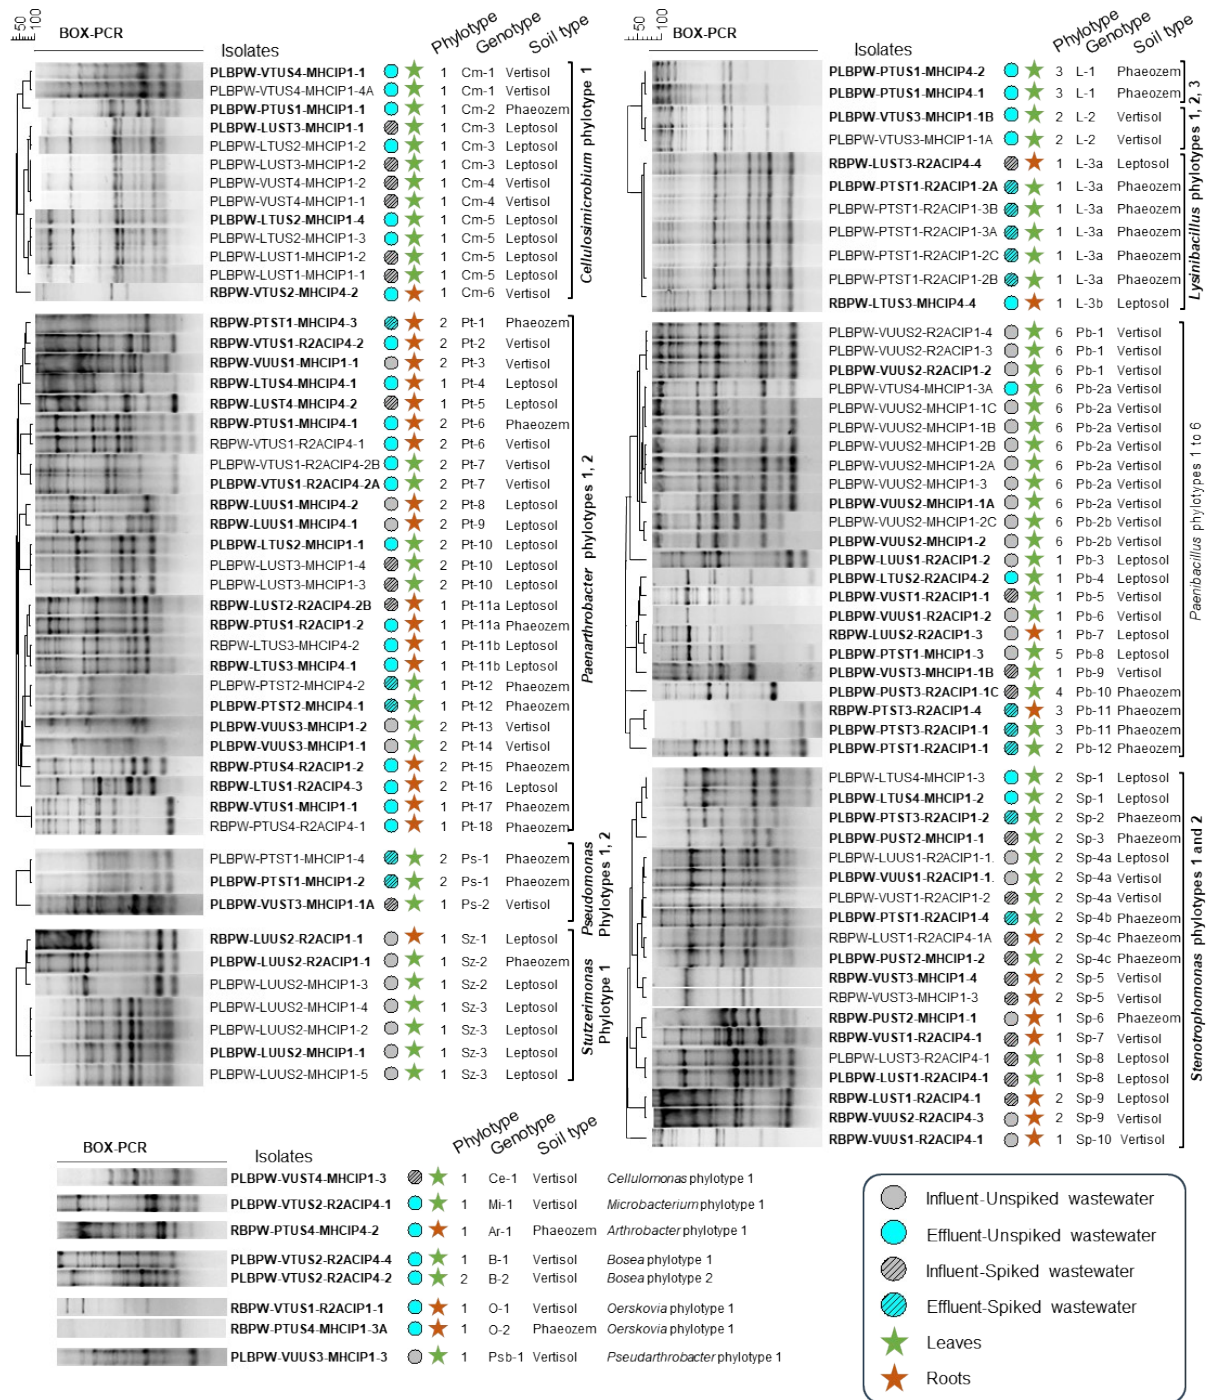

**Figure S8.** Genotyping of all bacterial phylotypes beside *Achromobacter* based on fingerprint patterns obtained by genomic fingerprinting using primer BOXA1R. Cluster analysis was performed in BioNumerics version 8 (Applied Maths, Belgium) using UPGMA clustering, based on a dissimilarity matrix generated by the Pearson correlation coefficient. Strains in bold font were identified by partial 16S rRNA gene sequencing.

## Supplementary reference

1. L. Soufi, I. D. Kampouris, K. Lüneberg, B. J. Heyde, D. Pulami, S. P. Glaeser, C. Siebe, J. Siemens, K. Smalla, E. Grohmann and S. Gallego, Wastewater-borne pollutants influenced antibiotic resistance genes and mobile genetic elements in the soil without affecting the bacterial community composition in a changing wastewater irrigation system. *J Hazard Mater.* 2025, **494**, 138680.
2. J. Siemens, G. Huschek, C. Siebe, M Kaupenjohann. Concentrations and mobility of human pharmaceuticals in the world's largest wastewater irrigation system, Mexico City-Mezquitil Valley. *Water Res.*, 2008, **42**, 2124–2134.
3. J. Versalovic, M. Schneider, F. J. de Bruijn and J. R. Lupski, Genomic fingerprinting of bacteria using repetitive sequence-based polymerase chain reaction, *Methods Mol. Cell Biol.*, 1994, **5**, 25-40.
4. S. P. Glaeser, H. Galatis, K. Martin and P. Kämpfer, *Niabella hirudinis* and *Niabella drilacis* sp. nov., isolated from the medicinal leech *Hirudo verbana*, *Int. J. Syst. Evol. Microbiol.*, 2013, **63**, 3487-3493.
5. D. J. Lane, 16S/23S rRNA Sequencing, *Nucleic acid techniques in bacterial systematics*, 1991.
6. T. Spilker, P. Vandamme and J. J. LiPuma, A multilocus sequence typing scheme implies population structure and reveals several putative novel *Achromobacter* species, *J. Clin. Microbiol.*, 2012, **50**(9), 3010-3015.
7. A. Magallon, M. Roussel, C. Neuwirth, J. Tetu, A. C. Cheiakh, B. Boulet, V. Varin, V. Urbain, J. Bador and L. Amoureux, Fluoroquinolone resistance in *Achromobacter* spp.: substitutions in QRDRs of GyrA, GyrB, ParC and ParE and implication of the RND efflux system AxyEF-OprN. *J. Antimicrob. Chemother.*, 2021, **76**, 297–304.
8. J. P. R. Furlan, D. G. Sanchez, I. F. L. Gallo and E. G. Stehling, Replicon typing of plasmids in environmental *Achromobacter* sp. producing quinolone-resistant determinants, *APMIS*, 2018, **126**(11), 864-869.
9. V. Cattoir, L. Poirel, V. Rotimi, C. J. Soussy and P. Nordmann, Multiplex PCR for detection of plasmid-mediated quinolone resistance *qnr* genes in ESBL-producing enterobacterial isolates, *J. Antimicrob. Chemother.*, 2007, **60**(2), 394-397.
10. S. Alipour, M. Owrang, M. Rajabnia, M. Olfatifar, H. Kazemian and H. Hourii, Prevalence of plasmid-mediated quinolone resistance genes in *Escherichia coli* isolates from colonic biopsies of Iranian patients with inflammatory bowel diseases: a cross-sectional study. *Health Sci Rep.* 2024, **7**(12), e70204.
11. J. Felsenstein, Evolutionary trees from DNA sequences: a maximum likelihood approach, *J. Mol. Evol.*, 1981, **17**(6), 368-376.
12. M. Nei and S. Kumar, *Molecular evolution and phylogenetics*. Oxford university press, 2000.
13. D. T. Jones, W. R. Taylor and J. M. Thornton, The rapid generation of mutation data matrices from protein sequences, *Bioinformatics*, 1992, **8**(3), 275-282.
14. K. Tamura, G. Stecher and S. Kumar, MEGA11: Molecular evolutionary genetics analysis version 11. *Mol. Biol. Evol.*, 2021, **38**(7), 3022-3027.
